# Supplementary material for: Animal Shelters’ Response to the COVID-19 Pandemic: A Pilot Survey of 14 Shelters in the Northeastern United States
Source: MDPI journal article supplement (doi:10.3390/ani11092669), 2021-09-10
Supplement: s1 [file s1]

**Supplementary Table S1.** Canine intake and outcome data for March-June 2019 and 2020 ( $n = 12$ )

|                       | Year            | Intake             |                   |                | Outcome |                            |                       |                 | Housing    |                              |        |                          |
|-----------------------|-----------------|--------------------|-------------------|----------------|---------|----------------------------|-----------------------|-----------------|------------|------------------------------|--------|--------------------------|
|                       |                 | Owner<br>surrender | Stray/<br>unowned | Transfer<br>in | Adopted | Adoption<br>% <sup>a</sup> | Return<br>to<br>owner | Transfer<br>out | Euthanized | Euthanasia<br>% <sup>a</sup> | Foster | Foster<br>% <sup>b</sup> |
| <b>Shelter<br/>1</b>  | 2019            | 36                 | 0                 | 269            | 302     | 99                         | 2                     | 8               | 5          | 2                            | 69     | 23                       |
|                       | 2020            | 39                 | 0                 | 188            | 206     | 91                         | 1                     | 0               | 7          | 3                            | 105    | 46                       |
|                       | <i>% change</i> | 8                  | 0                 | -30            | -32     | -8                         | -50                   | -100            | 40         | 88                           | 52     | 105                      |
| <b>Shelter<br/>2</b>  | 2019            | 32                 | 16                | 5              | 48      | 91                         | 6                     | 1               | 0          | 0                            | 0      | 0                        |
|                       | 2020            | 30                 | 25                | 0              | 36      | 65                         | 11                    | 0               | 0          | 0                            | 9      | 7                        |
|                       | <i>% change</i> | -6                 | 56                | -100           | -25     | -28                        | 83                    | -100            | 0          | 0                            | N/A    | N/A                      |
| <b>Shelter<br/>3</b>  | 2019            | 62                 | 0                 | 0              | 71      | 115                        | 0                     | 0               | 0          | 0                            | -      | -                        |
|                       | 2020            | 58                 | 0                 | 0              | 60      | 103                        | 0                     | 0               | 0          | 0                            | -      | -                        |
|                       | <i>% change</i> | -6                 | 0                 | 0              | -15     | -10                        | 0                     | 0               | 0          | 0                            | -      | -                        |
| <b>Shelter<br/>4</b>  | 2019            | 66                 | 12                | 89             | 185     | 111                        | 16                    | 4               | 12         | 7                            | -      | -                        |
|                       | 2020            | 39                 | 5                 | 34             | 98      | 126                        | 3                     | 2               | 1          | 1                            | -      | -                        |
|                       | <i>% change</i> | -41                | -58               | -62            | -47     | 13                         | -81                   | -50             | -92        | -82                          | -      | -                        |
| <b>Shelter<br/>5</b>  | 2019            | 21                 | 16                | 105            | 115     | 81                         | 8                     | 1               | 2          | 1                            | 25     | 12                       |
|                       | 2020            | 19                 | 3                 | 81             | 105     | 102                        | 0                     | 0               | 0          | 0                            | 12     | 4                        |
|                       | <i>% change</i> | -10                | -81               | -23            | -9      | 26                         | -100                  | -100            | -100       | -100                         | -52    | -65                      |
| <b>Shelter<br/>6</b>  | 2019            | 221                | 10                | 155            | 227     | 59                         | 22                    | 23              | 132        | 34                           | -      | -                        |
|                       | 2020            | 136                | 4                 | 13             | 55      | 36                         | 12                    | 10              | 89         | 58                           | -      | -                        |
|                       | <i>% change</i> | -38                | -60               | -92            | -76     | -39                        | -45                   | -57             | -33        | 70                           | -      | -                        |
| <b>Shelter<br/>8</b>  | 2019            | 37                 | 183               | 363            | 438     | 75                         | 0                     | 0               | 8          | 1                            | 113    | 44                       |
|                       | 2020            | 22                 | 146               | 122            | 202     | 70                         | 0                     | 0               | 2          | 1                            | 61     | 25                       |
|                       | <i>% change</i> | -41                | -20               | -66            | -54     | -7                         | 0                     | 0               | -75        | -50                          | -46    | -44                      |
| <b>Shelter<br/>10</b> | 2019            | 93                 | 305               | 1              | 203     | 51                         | 128                   | 26              | 29         | 7                            | 163    | 31                       |
|                       | 2020            | 113                | 159               | 0              | 164     | 60                         | 93                    | 27              | 12         | 4                            | 48     | 13                       |
|                       | <i>% change</i> | 22                 | -48               | -100           | -19     | 18                         | -27                   | 4               | -59        | -39                          | -71    | -59                      |
| <b>Shelter<br/>11</b> | 2019            | 143                | 100               | 1              | 106     | 43                         | 85                    | 3               | 7          | 3                            | 40     | 100                      |
|                       | 2020            | 91                 | 80                | 0              | 62      | 36                         | 72                    | 0               | 4          | 2                            | 63     | 100                      |
|                       | <i>% change</i> | -36                | -20               | -100           | -42     | -8                         | -15                   | -100            | -43        | -18                          | 58     | 0                        |
| <b>Shelter<br/>12</b> | 2019            | 101                | 88                | 257            | 357     | 80                         | 75                    | 3               | 16         | 4                            | -      | -                        |
|                       | 2020            | 40                 | 54                | 27             | 114     | 94                         | 48                    | 1               | 4          | 3                            | -      | -                        |

|                       |                 |      |     |      |     |     |     |      |     |     |      |      |
|-----------------------|-----------------|------|-----|------|-----|-----|-----|------|-----|-----|------|------|
|                       | <i>% change</i> | -60  | -39 | -89  | -68 | 18  | -36 | -67  | -75 | -8  | -    | -    |
| <b>Shelter<br/>13</b> | 2019            | 65   | 46  | 28   | 106 | 76  | 44  | 1    | 7   | 5   | 6    | 2    |
|                       | 2020            | 60   | 30  | 7    | 59  | 61  | 34  | 0    | 10  | 10  | 0    | 0    |
|                       | <i>% change</i> | -8   | -35 | -75  | -44 | -20 | -23 | -100 | 43  | 105 | -100 | -100 |
| <b>Shelter<br/>14</b> | 2019            | 7    | 38  | 1    | 14  | 30  | 31  | 1    | 0   | 0   | 0    | 0    |
|                       | 2020            | 0    | 20  | 0    | 8   | 40  | 18  | 0    | 0   | 0   | 4    | 13   |
|                       | <i>% change</i> | -100 | -47 | -100 | -43 | 31  | -42 | -100 | 0   | 0   | N/A  | N/A  |

Data show n cases between March-June unless indicated otherwise. <sup>a</sup> adoption and euthanasia rates calculated relative to intake, meaning rates may exceed 100% if more animals were adopted/euthanaized than entered the shelter during this period due to the existing shelter population. <sup>b</sup> foster care rates calculated relative to shelter population.

**Supplementary Table S2.** Feline intake and outcome data for March-June 2019 and 2020 (*n* = 14)

|            |          | Intake             |                   |                |         | Outcome                   |                       |                 |                       | Housing    |                              |        |                          |
|------------|----------|--------------------|-------------------|----------------|---------|---------------------------|-----------------------|-----------------|-----------------------|------------|------------------------------|--------|--------------------------|
|            |          | Owner<br>surrender | Stray/<br>unowned | Transfer<br>in | Adopted | Adopted<br>% <sup>a</sup> | Return<br>to<br>owner | Transfer<br>out | Return<br>to<br>field | Euthanized | Euthanasia<br>% <sup>a</sup> | Foster | Foster<br>% <sup>b</sup> |
| Shelter 1  | 2019     | 231                | 0                 | 178            | 306     | 75                        | 6                     | 0               | 0                     | 11         | 3                            | 267    | 65                       |
|            | 2020     | 197                | 0                 | 106            | 209     | 69                        | 10                    | 4               | 0                     | 6          | 2                            | 275    | 77                       |
|            | % change | -15                | 0                 | -40            | -32     | -8                        | 67                    | N/A             | 0                     | -45        | -26                          | 3      | 19                       |
| Shelter 2  | 2019     | 2                  | 51                | 0              | 48      | 91                        | 0                     | 0               | 0                     | 0          | 0                            | 0      | 0                        |
|            | 2020     | 0                  | 70                | 1              | 58      | 82                        | 0                     | 0               | 0                     | 4          | 6                            | 20     | 13                       |
|            | % change | -100               | 37                | N/A            | 21      | -10                       | 0                     | 0               | 0                     | n/a        | n/a                          | n/a    | n/a                      |
| Shelter 3  | 2019     | 269                | 0                 | 0              | 194     | 72                        | 0                     | 0               | 0                     | 0          | 0                            | -      | -                        |
|            | 2020     | 250                | 0                 | 0              | 176     | 70                        | 0                     | 0               | 0                     | 0          | 0                            | -      | -                        |
|            | % change | -7                 | 0                 | 0              | -9      | -2                        | 0                     | 0               | 0                     | 0          | 0                            | -      | -                        |
| Shelter 4  | 2019     | 411                | 39                | 90             | 411     | 76                        | 10                    | 4               | 2                     | 13         | 2                            | -      | -                        |
|            | 2020     | 151                | 33                | 38             | 289     | 130                       | 0                     | 1               | 1                     | 9          | 4                            | -      | -                        |
|            | % change | -63                | -15               | -58            | -30     | 71                        | -100                  | -75             | -50                   | -31        | 68                           | -      | -                        |
| Shelter 5  | 2019     | 12                 | 74                | 0              | 89      | 103                       | 2                     | 1               | 27                    | 11         | 13                           | 70     | 9                        |
|            | 2020     | 9                  | 56                | 17             | 61      | 74                        | 0                     | 0               | 0                     | 4          | 5                            | 99     | 16                       |
|            | % change | -25                | -24               | N/A            | -31     | -28                       | -100                  | -100            | -100                  | -64        | -62                          | 41     | 75                       |
| Shelter 6  | 2019     | 445                | 191               | 226            | 672     | 78                        | 28                    | 6               | 0                     | 123        | 14                           | -      | -                        |
|            | 2020     | 230                | 58                | 94             | 297     | 78                        | 19                    | 5               | 0                     | 104        | 27                           | -      | -                        |
|            | % change | -48                | -70               | -58            | -56     | 0                         | -32                   | -17             | 0                     | -15        | 91                           | -      | -                        |
| Shelter 7  | 2019     | 1                  | 47                | 0              | 33      | 69                        | 0                     | 0               | 1                     | 3          | 6                            | -      | -                        |
|            | 2020     | 4                  | 52                | 0              | 27      | 48                        | 0                     | 0               | 0                     | 9          | 16                           | -      | -                        |
|            | % change | 300                | 11                | 0              | -18     | -30                       | 0                     | 0               | -100                  | 200        | 157                          | -      | -                        |
| Shelter 8  | 2019     | 50                 | 593               | 49             | 411     | 59                        | 0                     | 0               | 7                     | 37         | 5                            | 223    | 27                       |
|            | 2020     | 74                 | 587               | 30             | 392     | 57                        | 0                     | 0               | 10                    | 18         | 3                            | 293    | 43                       |
|            | % change | 48                 | -1                | -39            | -5      | -4                        | 0                     | 0               | 43                    | -51        | -51                          | 31     | 61                       |
| Shelter 9  | 2019     | 45                 | 39                | 24             | 98      | 91                        | 0                     | 4               | 0                     | 0          | 0                            | 64     | 31                       |
|            | 2020     | 22                 | 37                | 8              | 62      | 93                        | 2                     | 1               | 0                     | 0          | 0                            | 30     | 25                       |
|            | % change | -51                | -5                | -67            | -37     | 2                         | N/A                   | -75             | 0                     | 0          | 0                            | -53    | -20                      |
| Shelter 10 | 2019     | 226                | 671               | 3              | 444     | 49                        | 10                    | 102             | 40                    | 77         | 9                            | 683    | 56                       |

|                   |          |     |     |      |     |    |      |      |      |     |     |     |     |
|-------------------|----------|-----|-----|------|-----|----|------|------|------|-----|-----|-----|-----|
|                   | 2020     | 223 | 439 | 0    | 384 | 58 | 15   | 40   | 18   | 49  | 7   | 522 | 56  |
|                   | % change | -1  | -35 | -100 | -14 | 18 | 50   | -61  | -55  | -36 | -14 | -24 | 1   |
| <b>Shelter 11</b> | 2019     | 119 | 276 | 0    | 141 | 36 | 8    | 1    | 1    | 70  | 18  | 395 | 100 |
|                   | 2020     | 117 | 241 | 0    | 126 | 35 | 7    | 0    | 46   | 8   | 2   | 649 | 100 |
|                   | % change | -2  | -13 | 0    | -11 | -1 | -13  | -100 | 4500 | -89 | -87 | 64  | 0   |
| <b>Shelter 12</b> | 2019     | 129 | 110 | 216  | 379 | 83 | 11   | 1    | 0    | 13  | 3   | -   | -   |
|                   | 2020     | 75  | 49  | 84   | 160 | 77 | 14   | 0    | 0    | 6   | 3   | -   | -   |
|                   | % change | -42 | -55 | -61  | -58 | -8 | 27   | -100 | 0    | -54 | 1   | -   | -   |
| <b>Shelter 13</b> | 2019     | 210 | 121 | 0    | 186 | 56 | 28   | 0    | 22   | 22  | 7   | 126 | 17  |
|                   | 2020     | 134 | 150 | 3    | 189 | 66 | 11   | 1    | 34   | 22  | 8   | 132 | 23  |
|                   | % change | -36 | 24  | N/A  | 2   | 17 | -61  | N/A  | 55   | 0   | 15  | 5   | 30  |
| <b>Shelter 14</b> | 2019     | 6   | 74  | 0    | 32  | 40 | 1    | 0    | 0    | 11  | 14  | -   | -   |
|                   | 2020     | 5   | 54  | 0    | 38  | 64 | 0    | 1    | 0    | 4   | 7   | -   | -   |
|                   | % change | -17 | -27 | 0    | 19  | 61 | -100 | N/A  | 0    | -64 | -51 | -   | -   |

Data show n cases between March-June unless indicated otherwise. <sup>a</sup> adoption and euthanasia rates calculated relative to intake, meaning rates may exceed 100% if more animals were adopted/euthanaized than entered the shelter during this period due to the existing shelter population. <sup>b</sup> foster care rates calculated relative to shelter population.

**Supplementary Table S3.** Changes to intake and outcome operations relative to COVID-19.

|                                          | Shelters |     |     |     |     |     |     |     |     |     |     |     |     |     |     |     |     |     |     |     |     |     |
|------------------------------------------|----------|-----|-----|-----|-----|-----|-----|-----|-----|-----|-----|-----|-----|-----|-----|-----|-----|-----|-----|-----|-----|-----|
|                                          | 1        |     | 2   |     | 3   |     | 4   |     | 5   |     | 6   |     | 7   |     | 8   |     | 9   |     | 10  |     | 11  |     |
|                                          | '19      | '20 | '19 | '20 | '19 | '20 | '19 | '20 | '19 | '20 | '19 | '20 | '19 | '20 | '19 | '20 | '19 | '20 | '19 | '20 | '19 | '20 |
| <b>Intake</b>                            |          |     |     |     |     |     |     |     |     |     |     |     |     |     |     |     |     |     |     |     |     |     |
| Intake by appointment                    | ✓        | ✓   | ✓   | ✓   | ✓   | ✓   | ✓   | ✓   | ✓   | ✓   | ✓   | ✓   | X   | ✓   | -   | -   | ✓   | ✓   | ✓   | ✓   | -   | -   |
| Owner surrenders                         | ✓        | ✓   | ✓   | ✓   | -   | -   | ✓   | ✓   | ✓   | ✓   | ✓   | ✓   | -   | -   | ✓   | ✓   | ✓   | ✓   | ✓   | ✓   | X   | X   |
| Sick/injured dogs and cats               | X        | X   | ✓   | ✓   | -   | -   | ✓   | ✓   | ✓   | ✓   | ✓   | ✓   | -   | -   | ✓   | ✓   | X   | ✓   | ✓   | ✓   | ✓   | ✓   |
| Healthy stray dogs                       | X        | X   | ✓   | ✓   | -   | -   | ✓   | ✓   | ✓   | ✓   | X   | X   | -   | -   | ✓   | ✓   | X   | X   | ✓   | ✓   | X   | X   |
| Healthy stray puppies                    | X        | X   | ✓   | ✓   | -   | -   | ✓   | ✓   | ✓   | ✓   | X   | X   | -   | -   | ✓   | ✓   | X   | X   | ✓   | ✓   | X   | X   |
| Healthy stray cats                       | X        | X   | ✓   | ✓   | -   | -   | ✓   | ✓   | ✓   | ✓   | ✓   | ✓   | -   | -   | ✓   | ✓   | ✓   | ✓   | ✓   | ✓   | X   | X   |
| Healthy stray kittens                    | ✓        | ✓   | ✓   | ✓   | -   | -   | ✓   | ✓   | ✓   | ✓   | ✓   | ✓   | -   | -   | ✓   | ✓   | ✓   | ✓   | ✓   | ✓   | X   | X   |
| Pick-up/trap pets of owners in crisis    | X        | X   | X   | X   | -   | -   | ✓   | X   | X   | ✓   | X   | X   | -   | -   | X   | ✓   | X   | X   | ✓   | ✓   | X   | X   |
| Pick-up/trap non-aggressive animals      | X        | X   | X   | X   | -   | -   | X   | X   | X   | X   | X   | X   | -   | -   | X   | ✓   | X   | X   | ✓   | ✓   | X   | X   |
| Pick-up/trap aggressive animals          | X        | X   | X   | X   | -   | -   | X   | X   | X   | X   | X   | X   | -   | -   | ✓   | ✓   | X   | X   | ✓   | ✓   | X   | X   |
| <b>Outcomes</b>                          |          |     |     |     |     |     |     |     |     |     |     |     |     |     |     |     |     |     |     |     |     |     |
| <b>Adoption</b>                          |          |     |     |     |     |     |     |     |     |     |     |     |     |     |     |     |     |     |     |     |     |     |
| Adoption by appointment                  | X        | ✓   | ✓   | ✓   | ✓   | ✓   | X   | ✓   | X   | ✓   | X   | ✓   | X   | ✓   | -   | -   | X   | ✓   | X   | ✓   | -   | -   |
| Adoption ambassadors                     | X        | ✓   | ✓   | ✓   | ✓   | ✓   | X   | X   | X   | X   | ✓   | ✓   | X   | ✓   | -   | -   | ✓   | ✓   | ✓   | ✓   | -   | -   |
| Open adoptions program                   | ✓        | ✓   | ✓   | ✓   | X   | X   | ✓   | ✓   | X   | X   | ✓   | ✓   | X   | X   | -   | -   | ✓   | ✓   | ✓   | ✓   | -   | -   |
| Open selection program                   | X        | X   | X   | X   | X   | X   | X   | X   | X   | X   | X   | X   | X   | X   | -   | -   | X   | X   | X   | X   | -   | -   |
| Spay/neuter prior to adoption            | ✓        | ✓   | ✓   | ✓   | -   | -   | ✓   | X   | ✓   | X   | ✓   | X   | -   | -   | ✓   | ✓   | ✓   | ✓   | ✓   | ✓   | X   | X   |
| Animal adopted before spay/neuter        | X        | X   | X   | X   | -   | -   | X   | ✓   | X   | ✓   | X   | ✓   | -   | -   | ✓   | X   | X   | X   | X   | X   | X   | X   |
| <b>Return to owner/field</b>             |          |     |     |     |     |     |     |     |     |     |     |     |     |     |     |     |     |     |     |     |     |     |
| Return to owner                          | X        | X   | ✓   | ✓   | -   | -   | ✓   | ✓   | ✓   | ✓   | ✓   | ✓   | -   | -   | ✓   | ✓   | X   | X   | ✓   | ✓   | X   | X   |
| Return-to-field for adult cats           | X        | X   | X   | X   | -   | -   | ✓   | X   | ✓   | X   | ✓   | ✓   | -   | -   | X   | ✓   | ✓   | ✓   | ✓   | ✓   | X   | X   |
| <b>Foster care</b>                       |          |     |     |     |     |     |     |     |     |     |     |     |     |     |     |     |     |     |     |     |     |     |
| Finder-to-foster program                 | X        | X   | X   | X   | X   | X   | X   | X   | ✓   | ✓   | X   | X   | X   | X   | -   | -   | ✓   | ✓   | X   | ✓   | -   | -   |
| Foster-on-deck (waitlist of carers)      | ✓        | ✓   | X   | X   | X   | X   | X   | X   | X   | ✓   | X   | X   | X   | ✓   | -   | -   | X   | X   | X   | X   | -   | -   |
| Spay/neuter prior to foster              | X        | X   | ✓   | ✓   | -   | -   | X   | X   | ✓   | X   | ✓   | ✓   | -   | -   | ✓   | ✓   | X   | X   | ✓   | ✓   | X   | X   |
| Animal sent to foster before spay/neuter | ✓        | ✓   | X   | ✓   | -   | -   | ✓   | ✓   | X   | X   | ✓   | ✓   | -   | -   | ✓   | X   | ✓   | ✓   | ✓   | ✓   | X   | X   |

X indicates the shelter did not offer the program in 2019 or 2020. ✓ indicates the shelter did offer the program in 2019 or 2020. Red text shows a change between 2019 and 2020. Shelters 12, 13 and 14 did not provide data regarding their shelter operations.

**Supplementary Table S4.** Changes to community programs relative to COVID-19.

[illegible]
